# Supplementary material for: Rapid Analysis of Residues of 186 Pesticides in Hawk Tea Using Modified QuEChERS Coupled with Gas Chromatography Tandem Mass Spectrometry
Source: MDPI journal article supplement (doi:10.3390/ijerph191912639), 2022-10-03
Supplement: s1 [file s1]

## Supplementary Materials

**Table S1 The major constituents of hawk tea processed by different methods**

| Major Constituents   | Traditional Method | Green-Tea Method | Semi Fermented Method |
|----------------------|--------------------|------------------|-----------------------|
| Water extracts (%)   | 21.6               | 33.5             | 32                    |
| Caffeine (%)         | 0                  | 0                | 0.1                   |
| Protein (%)          | 21.1               | 26.2             | 26.4                  |
| Total ash (%)        | 5.8                | 5.5              | 5.3                   |
| Tea polyphenols (%)  | 7.8                | 13               | 10                    |
| Total flavonoids (%) | 2                  | 2                | 2.1                   |
| Soluble sugar (%)    | 0.3                | 0.2              | 0.3                   |
| Fat (%)              | 2.4                | 4.1              | 3.2                   |
| Vitamin C (mg/g)     | 0.2                | 0.2              | 0.2                   |

**Table S2 the comparison of different adsorbent combination on recoveries and RSDs for 186**

### pesticides

| No. | Pesticides           | GCB        |      | MWCNTs     |      | EMR+ MWCNTs |      |
|-----|----------------------|------------|------|------------|------|-------------|------|
|     |                      | Recoveries | RSD  | Recoveries | RSD  | Recoveries  | RSD  |
|     |                      | (%)        |      | (%)        |      | (%)         |      |
| 1   | dichlorvos           | 71.3       | 13.6 | 71.5       | 7.6  | 73.9        | 11.4 |
| 2   | dichlorobenzonitrile | 66.6       | 9.7  | 70.9       | 2.7  | 65.8        | 10.9 |
| 3   | biphenyl             | 60.3       | 11.4 | 60.4       | 1.2  | 56          | 16.9 |
| 4   | etridiazole          | 53.7       | 15.4 | 55.8       | 14.7 | 58.8        | 10.4 |
| 5   | propoxur             | 65         | 11.5 | 56.7       | 3.6  | 66.2        | 14.3 |
| 6   | isoprocarb           | 68.7       | 2.8  | 66.4       | 11.2 | 73          | 5.8  |
| 7   | tecnazene            | 54.1       | 9.4  | 59.2       | 2.2  | 52.9        | 8.4  |
| 8   | diphenylamine        | 67.2       | 6.1  | 69.5       | 1.4  | 70.6        | 3.4  |
| 9   | ethoprophos          | 83.7       | 5.1  | 91.9       | 5.5  | 94.7        | 13.7 |
| 10  | chlorpropham         | 72.1       | 1.6  | 66.2       | 4.7  | 70.4        | 10.7 |
| 11  | benfluralin          | 84.3       | 5.5  | 83.8       | 0.7  | 82.2        | 3.7  |

|    |                    |       |      |       |     |       |      |
|----|--------------------|-------|------|-------|-----|-------|------|
| 12 | sulfotep           | 82.5  | 3.8  | 92.6  | 2.7 | 92.8  | 3.8  |
| 13 | monocrotophos      | 79.1  | 8.3  | 83.1  | 2.3 | 77.3  | 10.9 |
| 14 | phorate            | 63.4  | 5.8  | 62.8  | 5.2 | 67.2  | 4.1  |
| 15 | alpha-BHC          | 36.1  | 10   | 43.1  | 4.2 | 44.6  | 8.6  |
| 16 | dimethoate         | 81.9  | 1.8  | 85.8  | 2.4 | 88.1  | 2.7  |
| 17 | simazine           | 64.1  | 5.2  | 63.5  | 8.2 | 67.8  | 7.3  |
| 18 | atrazine           | 67.5  | 7.2  | 65.5  | 8   | 67.5  | 7.2  |
| 19 | beta BHC           | 55.2  | 16.6 | 63.4  | 2.8 | 60.9  | 11.8 |
| 20 | clomazone          | 88.1  | 1.9  | 98.3  | 3.1 | 93    | 2.5  |
| 21 | propazine          | 65.7  | 2.7  | 63    | 2.3 | 62.3  | 2.1  |
| 22 | gamma-BHC          | 84.4  | 6.6  | 73.1  | 4.9 | 86    | 7    |
| 23 | profluralin        | 73    | 6.7  | 67.4  | 5.7 | 70.2  | 0.8  |
| 24 | terbuthylazine     | 72.3  | 8    | 73.1  | 5.4 | 70.6  | 2.7  |
| 25 | terbufos           | 82.8  | 6.3  | 72.8  | 3.5 | 82.8  | 6    |
| 26 | fonofos            | 75.9  | 5.7  | 75.1  | 5.2 | 74.1  | 9.4  |
| 27 | pronamide          | 87    | 6.1  | 92.5  | 7   | 93.4  | 5.3  |
| 28 | diazinon           | 108.8 | 7    | 114.1 | 4.7 | 106.4 | 8    |
| 29 | pyrimethanil       | 65.7  | 9.8  | 63.3  | 3.1 | 65.2  | 7.1  |
| 30 | isazofos           | 90.5  | 2.6  | 93.3  | 1.5 | 96.4  | 2.6  |
| 31 | etrimfos           | 108.1 | 6.6  | 113.8 | 2.3 | 101.8 | 2.4  |
| 32 | delta-BHC          | 72.7  | 6.3  | 74.9  | 0.2 | 73.9  | 4.4  |
| 33 | triallate          | 78.8  | 3.5  | 80    | 1.9 | 82.9  | 5.8  |
| 34 | tebupirimfos       | 85.1  | 5.5  | 82    | 2.5 | 84.2  | 5.4  |
| 35 | pirimicarb         | 77.9  | 7.8  | 84.1  | 2.2 | 80.1  | 4.3  |
| 36 | iprobenfos         | 86.4  | 4.6  | 91.8  | 1.7 | 89.2  | 2.2  |
| 37 | formothion         | 85.2  | 6.1  | 76.9  | 3.6 | 85.1  | 8.5  |
| 38 | pentachloroaniline | 54.5  | 7.2  | 62.4  | 5.7 | 56.5  | 9.6  |
| 39 | phosphamidon       | 83.7  | 10.1 | 90.2  | 8.7 | 88.3  | 17.9 |
| 40 | dichlofenthion     | 88.6  | 2.2  | 80.5  | 3.8 | 83.9  | 2.7  |

|    |                   |       |      |       |      |       |      |
|----|-------------------|-------|------|-------|------|-------|------|
| 41 | desmetryn         | 79.3  | 3.7  | 83.5  | 5.7  | 77.7  | 8.2  |
| 42 | propanil          | 83.5  | 4.9  | 87.2  | 4.8  | 85.7  | 2.7  |
| 43 | acetochlor        | 106.6 | 3.5  | 110.4 | 3    | 101.2 | 2.5  |
| 44 | phenthoate        | 90.8  | 2.5  | 100.3 | 2.5  | 96    | 6.7  |
| 45 | malaoxon          | 53.3  | 10.2 | 55.1  | 3.7  | 51.5  | 8.8  |
| 46 | vinclozolin       | 76.5  | 3.8  | 86.2  | 2.4  | 81.1  | 1.7  |
| 47 | parathion methyl  | 79.7  | 4    | 89.7  | 2.2  | 81.8  | 1.4  |
| 48 | tolclofos methyl  | 98.7  | 1.8  | 85.8  | 2.1  | 94.4  | 2.5  |
| 49 | alachlor          | 104.4 | 5.3  | 99.3  | 2.8  | 97.8  | 2.5  |
| 50 | ametryn           | 87.1  | 5.5  | 92.5  | 4.9  | 83.8  | 15.6 |
| 51 | metalaxyl         | 95.2  | 4.3  | 92.1  | 2.7  | 95.9  | 3.4  |
| 52 | ronnel            | 75.3  | 7.9  | 69.2  | 1.8  | 71.4  | 4.1  |
| 53 | prometryn         | 78.4  | 1.9  | 76.3  | 6.9  | 75.3  | 2.7  |
| 54 | pirimiphos methyl | 93.2  | 3.5  | 89.9  | 0.9  | 94.4  | 4.5  |
| 55 | terbutryn         | 80.4  | 3.6  | 73.8  | 3.1  | 77.8  | 2.7  |
| 56 | fenitrothion      | 97.4  | 2.1  | 89.2  | 2.9  | 92.8  | 0.8  |
| 57 | ethofumesate      | 95.5  | 3.6  | 85.6  | 4.1  | 94.7  | 1.4  |
| 58 | bromacil          | 75.7  | 4.4  | 78.6  | 14.2 | 74.9  | 5.2  |
| 59 | phorate sulfoxide | 85.6  | 5.2  | 77.2  | 4.1  | 82.7  | 10.4 |
| 60 | malathion         | 116.5 | 1.4  | 114.8 | 3.5  | 112.2 | 1    |
| 61 | dipropetryn       | 80.7  | 3.9  | 88.2  | 1.9  | 80.1  | 3.3  |
| 62 | metolachlor       | 92.4  | 2.7  | 106.6 | 3.5  | 93.8  | 0.3  |
| 63 | phoratesulfone    | 86.8  | 1.7  | 84.5  | 6    | 84.5  | 3.1  |
| 64 | chlorpyrifos      | 76.1  | 4.5  | 100.1 | 1.9  | 95.6  | 1.5  |
| 65 | thiobencarb       | 74.8  | 4.5  | 75.9  | 5.2  | 73.3  | 1.9  |
| 66 | fenthion          | 96.6  | 1.5  | 90.5  | 14.7 | 90.9  | 3    |
| 67 | parathion         | 96.4  | 1.7  | 98.4  | 5.8  | 92.9  | 2.7  |
| 68 | isofenphos oxon   | 82.8  | 3.7  | 99.7  | 2.6  | 91    | 0.7  |
| 69 | triadimefon       | 95.4  | 4.6  | 87.6  | 1.8  | 92.1  | 3.9  |

|    |                   |       |     |       |      |       |      |
|----|-------------------|-------|-----|-------|------|-------|------|
| 70 | buprofezin        | 95.4  | 4.7 | 100.5 | 7.3  | 94.4  | 9.6  |
| 71 | isocarbophos      | 109.7 | 4.9 | 94.6  | 3.6  | 104.6 | 6.3  |
| 72 | dicofol           | 89.3  | 4.9 | 102   | 2.9  | 92.9  | 4.6  |
| 73 | trichloronat      | 86    | 4.4 | 93.6  | 3.8  | 87    | 3.7  |
| 74 | pirimiphos ethyl  | 84.4  | 4.6 | 87    | 2.4  | 82.8  | 3.4  |
| 75 | bromophos         | 79.5  | 1.8 | 85    | 5.3  | 83.7  | 3.1  |
| 76 | isofenphos methyl | 92.1  | 4.1 | 94.9  | 3    | 93.5  | 1.7  |
| 77 | fosthiazate       | 66    | 7.4 | 70.3  | 2.4  | 70.7  | 10.7 |
| 78 | pendimethalin     | 88.9  | 2.5 | 95    | 6.6  | 87.6  | 3.9  |
| 79 | chlorfenvinphos   | 110.5 | 1.4 | 99.4  | 3.4  | 106.7 | 1.3  |
| 80 | cyprodinil        | 54.7  | 8   | 67.7  | 6.5  | 58.4  | 1.2  |
| 81 | terbufos sulfone  | 82.5  | 3.2 | 88.5  | 2.3  | 80.4  | 3.3  |
| 82 | fipronil          | 103.2 | 6.2 | 89.9  | 3.7  | 98.5  | 3.6  |
| 83 | penconazole       | 72.7  | 6.5 | 80.5  | 1.1  | 74.9  | 5.7  |
| 84 | phosfolan         | 55.1  | 7.8 | 62.8  | 16.8 | 59    | 2.3  |
| 85 | isofenphos        | 86.5  | 2.3 | 93.1  | 3.6  | 90.1  | 1    |
| 86 | beflubutamid      | 104.7 | 2.5 | 104.4 | 3.2  | 100.8 | 1.5  |
| 87 | quinalphos        | 76.6  | 0.8 | 88.4  | 2.8  | 85.5  | 2.1  |
| 88 | mephosfolan       | 64.8  | 5.7 | 71.2  | 4.2  | 65.4  | 3.2  |
| 89 | procymidone       | 108.3 | 2.4 | 93.4  | 3.9  | 103.6 | 1.3  |
| 90 | triadimenol       | 91.8  | 3.8 | 84    | 2.2  | 89.9  | 2.7  |
| 91 | bromophos ethyl   | 95.6  | 4.7 | 92.1  | 1.9  | 93.5  | 5.4  |
| 92 | methidathion      | 77.7  | 0.8 | 88.8  | 3.2  | 82.5  | 2.4  |
| 93 | chlordane trans   | 85.4  | 1.7 | 86.2  | 7    | 87.8  | 5.7  |
| 94 | op'-DDE           | 74.4  | 4.2 | 79    | 4.1  | 78.7  | 3.7  |
| 95 | paclobutrazol     | 82.5  | 3.7 | 90    | 6.6  | 88.2  | 2.4  |
| 96 | butachlor         | 84.4  | 4.7 | 95.9  | 3.5  | 95.3  | 3.8  |
| 97 | fenothiocarb      | 78.4  | 2.9 | 84.7  | 3.8  | 81    | 1.5  |
| 98 | ditalimfos        | 54.7  | 4.2 | 59.1  | 3.8  | 57.8  | 1.8  |

|     |                 |       |     |       |      |       |     |
|-----|-----------------|-------|-----|-------|------|-------|-----|
| 99  | butamifos       | 77.6  | 1.2 | 96.1  | 4.6  | 82    | 4.1 |
| 100 | napropamide     | 95    | 4.5 | 95.7  | 8.1  | 95.7  | 3.3 |
| 101 | bromfenvinfos   | 86.2  | 4.3 | 92.3  | 4.7  | 89    | 1   |
| 102 | fluorodifen     | 96.2  | 3.6 | 94.2  | 10.2 | 95.9  | 3.5 |
| 103 | flutolanil      | 111.5 | 4.5 | 108.1 | 6.3  | 101.8 | 0.6 |
| 104 | chlorfenson     | 109.2 | 1.7 | 107.8 | 3.7  | 99    | 3.8 |
| 105 | hexaconazole    | 81.5  | 1   | 85.8  | 7.1  | 84.2  | 6.6 |
| 106 | prothiofos      | 72.7  | 5.6 | 84.2  | 2.9  | 73.6  | 3.7 |
| 107 | fludioxonil     | 94.1  | 6.6 | 96.2  | 4.3  | 92.6  | 6.4 |
| 108 | pretilachlor    | 94.8  | 4.2 | 95.7  | 2.1  | 92.1  | 3.3 |
| 109 | isoprothiolane  | 90.1  | 1.3 | 100.4 | 4.4  | 93.2  | 2.7 |
| 110 | profenofos      | 91.6  | 1.8 | 81.4  | 5.9  | 88.7  | 0.4 |
| 111 | pp'-DDE         | 74.2  | 3.3 | 74.2  | 2.4  | 74.1  | 2.9 |
| 112 | oxadiazon       | 80.9  | 9.7 | 81.3  | 7.2  | 81.3  | 3.6 |
| 113 | DEF             | 74.6  | 4.6 | 83.8  | 3.7  | 78.1  | 0.3 |
| 114 | dieldrin        | 84.3  | 6.7 | 97    | 1.9  | 86.9  | 7.1 |
| 115 | myclobutanil    | 85.2  | 6.2 | 93.4  | 1.9  | 83.3  | 3.7 |
| 116 | op'-DDD         | 88.9  | 0.9 | 83.6  | 6.2  | 83.8  | 0.8 |
| 117 | oxyfluorfen     | 78.6  | 6.2 | 90.4  | 7.7  | 81.8  | 4.5 |
| 118 | bupirimate      | 75.6  | 6.4 | 120.7 | 1.4  | 75.5  | 2.3 |
| 119 | kresoxim methyl | 96.3  | 3.9 | 95.9  | 5.4  | 92.5  | 1.5 |
| 120 | cyflufenamid    | 82.4  | 6   | 89.3  | 3.5  | 83.7  | 8.6 |
| 121 | isoxathion      | 80.3  | 1.2 | 76.8  | 8.4  | 76.7  | 3.9 |
| 122 | cyproconazole 1 | 91    | 2   | 92.3  | 3.5  | 92    | 2.4 |
| 123 | fluazifop butyl | 100.7 | 1.6 | 95.1  | 6.6  | 93    | 1.9 |
| 124 | nitrofen        | 81.2  | 2.8 | 86.6  | 7.6  | 85.9  | 2.8 |
| 125 | endrin          | 83.4  | 6.4 | 79.1  | 4    | 79.5  | 4.2 |
| 126 | chlorobenzilate | 84.5  | 8.6 | 88.7  | 4.2  | 89.1  | 2.3 |
| 127 | fensulfothion   | 89.1  | 1.1 | 91.5  | 3.9  | 85.8  | 8.1 |

|     |                   |       |     |       |      |       |     |
|-----|-------------------|-------|-----|-------|------|-------|-----|
| 128 | diniconazole      | 65.7  | 5.8 | 72.6  | 4.8  | 71    | 2.4 |
| 129 | oxadixyl          | 105.6 | 4.1 | 99.5  | 3.9  | 96.6  | 2.6 |
| 130 | pp'-DDD           | 87.8  | 1.7 | 84    | 2.6  | 83.8  | 2   |
| 131 | ethion            | 112   | 2   | 105.7 | 2.8  | 105.4 | 1.9 |
| 132 | op'-DDT           | 76.8  | 0.8 | 78.2  | 10.6 | 76.9  | 3.6 |
| 133 | chlorthiophos     | 85.4  | 3.8 | 81.9  | 1.6  | 81.9  | 2.6 |
| 134 | aclonifen         | 64.8  | 2.4 | 70.9  | 5.9  | 71.2  | 3.2 |
| 135 | triazophos        | 86.8  | 1.5 | 90.4  | 6    | 85.7  | 0.2 |
| 136 | famphur           | 89.4  | 1.9 | 89.9  | 7.5  | 88.8  | 2.4 |
| 137 | benalaxyl         | 101.4 | 1.8 | 90.8  | 3.1  | 95.4  | 1.2 |
| 138 | carbophenothion   | 92.9  | 7.2 | 86.7  | 2.9  | 89.4  | 1.1 |
| 139 | trifloxystrobi    | 79.8  | 1.2 | 87.9  | 4.3  | 83.3  | 3.2 |
| 140 | edifenphos        | 75.5  | 5.3 | 78.7  | 2.1  | 77.1  | 2.1 |
| 141 | quinoxifen        | 46.5  | 8   | 55.8  | 6    | 49.7  | 5.8 |
| 142 | propiconazole     | 78    | 3   | 78.3  | 4.8  | 77.7  | 6.1 |
| 143 | pp'-DDT           | 80.4  | 3.8 | 76.3  | 3.6  | 79    | 1.1 |
| 144 | hexazinone        | 80.7  | 1.5 | 81.9  | 4.9  | 78.9  | 1.7 |
| 145 | tebuconazole      | 75.1  | 5.5 | 76.9  | 3.9  | 75.2  | 2.7 |
| 146 | diclofop methyl   | 90.3  | 9   | 101.6 | 4.4  | 92.9  | 1   |
| 147 | piperonylbutoxide | 122.8 | 4.4 | 115.7 | 6.9  | 119.7 | 3.4 |
| 148 | epoxiconazol      | 73.2  | 5.5 | 79.7  | 3.9  | 77.3  | 2.2 |
| 149 | pyridaphenthion   | 90.6  | 1.9 | 94.3  | 0.8  | 88    | 2.5 |
| 150 | iprodione         | 87.1  | 4.1 | 86.6  | 5.1  | 82.1  | 1.6 |
| 151 | phosmet           | 75.9  | 6.3 | 82.9  | 3.1  | 79    | 3.9 |
| 152 | bifenthrin        | 83.3  | 5.1 | 88.8  | 1.6  | 86.6  | 1.6 |
| 153 | EPN               | 80.3  | 1.9 | 78.9  | 1.5  | 78.5  | 3.2 |
| 154 | bromopropylate    | 100.4 | 4.6 | 89.4  | 10.5 | 93.5  | 2.1 |
| 155 | piperophos        | 85.1  | 5.1 | 90.4  | 3.6  | 90.7  | 2.6 |
| 156 | tetramethrin      | 97.2  | 4.2 | 92.1  | 3.4  | 92.9  | 4.3 |

|     |                    |       |     |       |     |       |     |
|-----|--------------------|-------|-----|-------|-----|-------|-----|
| 157 | methoxychlor       | 87.9  | 1.6 | 90    | 2.4 | 87.9  | 3.2 |
| 158 | etoxazole          | 88.8  | 1.6 | 88.6  | 5.6 | 86.6  | 3.3 |
| 159 | fenamidone         | 92.4  | 4.8 | 86    | 6.8 | 90.5  | 3   |
| 160 | tebufenpyrad       | 78.7  | 2.2 | 83.3  | 4.1 | 77.3  | 2.9 |
| 161 | anilofos           | 92.4  | 5.3 | 94.6  | 5.8 | 91.8  | 4.2 |
| 162 | bifenox            | 92.5  | 3.8 | 99.9  | 6.1 | 92.2  | 7.5 |
| 163 | tetradifon         | 75    | 5   | 84.5  | 2.7 | 73.9  | 3.6 |
| 164 | phosalone          | 86    | 5.5 | 82.6  | 1.9 | 83.3  | 1.6 |
| 165 | leptophos          | 64.3  | 4.4 | 70.8  | 4.2 | 70.8  | 4   |
| 166 | pyriproxyfen       | 82.6  | 4.3 | 81.3  | 2.9 | 80.6  | 1.4 |
| 167 | lambda cyhalothrin | 95.5  | 4.6 | 96.1  | 2.6 | 92.5  | 4   |
| 168 | mefenacet          | 89.5  | 1.1 | 83.5  | 3.5 | 85.4  | 1.5 |
| 169 | acrinathrin        | 76.2  | 5.9 | 85.5  | 4.1 | 75.9  | 2.7 |
| 170 | pyrazophos         | 75.9  | 6.1 | 80.2  | 5.1 | 77.7  | 7   |
| 171 | fenarimol          | 77.8  | 1.6 | 81.3  | 5.8 | 79.3  | 3.7 |
| 172 | azinphos ethyl     | 86.9  | 2   | 82.9  | 4.8 | 80.8  | 7.1 |
| 173 | permethrin 1       | 91.8  | 3.8 | 86.4  | 6.6 | 88.4  | 3.6 |
| 174 | coumaphos          | 105   | 2.5 | 104.9 | 6.1 | 96.4  | 4.6 |
| 175 | fluquinconazole    | 94.9  | 6   | 89.9  | 2.5 | 87    | 6.5 |
| 176 | pyridaben          | 74.3  | 4.7 | 76.2  | 6.5 | 73.7  | 3.2 |
| 177 | dioxathion         | 66.9  | 7.9 | 66.6  | 2.2 | 74.6  | 4.4 |
| 178 | fenbuconazole      | 82.8  | 2   | 79.4  | 1.4 | 85.5  | 5   |
| 179 | cyfluthrin         | 83.5  | 5.5 | 85.3  | 8.7 | 82.6  | 1.5 |
| 180 | cypermethri        | 75.6  | 5.7 | 86.3  | 4.7 | 78.9  | 3.5 |
| 181 | boscalid           | 67.4  | 5.5 | 71    | 0.7 | 72.8  | 3.5 |
| 182 | flucythrinate      | 96.2  | 4.8 | 93.9  | 2.7 | 92.2  | 3.1 |
| 183 | fenvalerate        | 116.5 | 4.7 | 114.1 | 2.3 | 119.1 | 3.9 |
| 184 | fluvalinate        | 71.4  | 2   | 77.6  | 4.2 | 76    | 3.7 |
| 185 | difenoconazole     | 76.4  | 5.3 | 82.1  | 5.2 | 77.7  | 3.6 |

|     |              |      |     |      |     |      |     |
|-----|--------------|------|-----|------|-----|------|-----|
| 186 | deltamethrin | 75.4 | 4.1 | 73.1 | 2.4 | 73.1 | 5.8 |
|-----|--------------|------|-----|------|-----|------|-----|

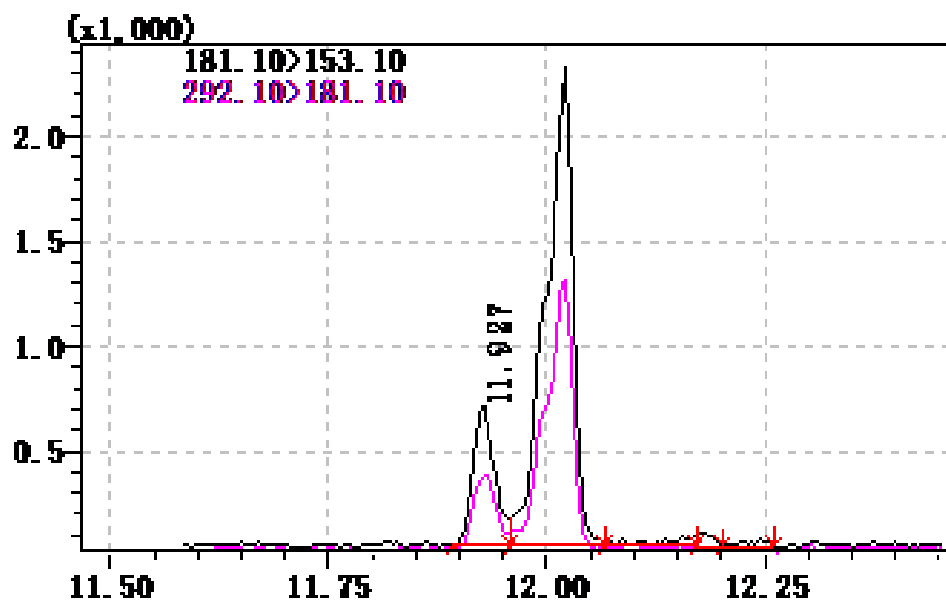

Figure S1 Chromatogram of etrimfos in the mixed solvent of acetonitrile and toluene

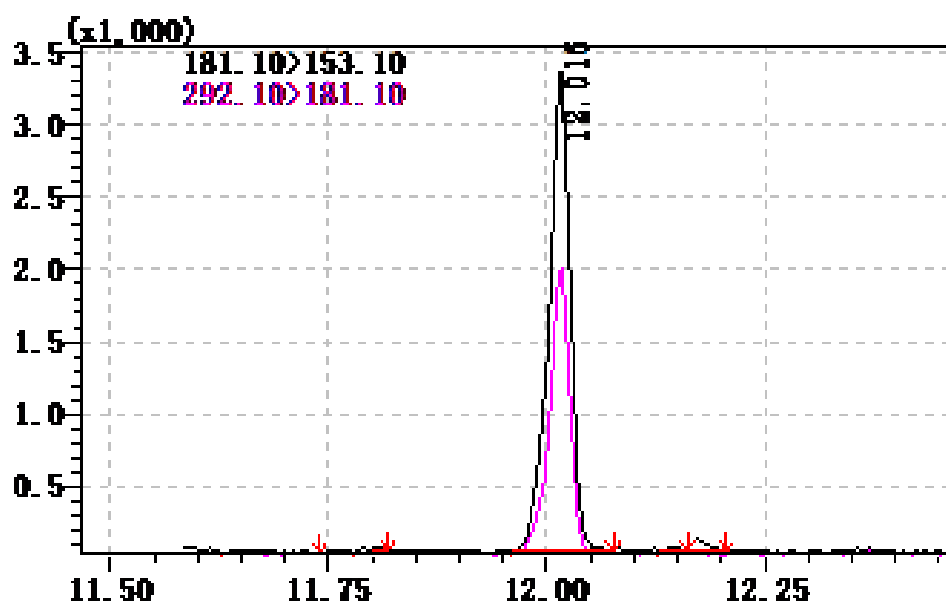

Figure S2 Chromatogram of etrimfos in ethyl acetate

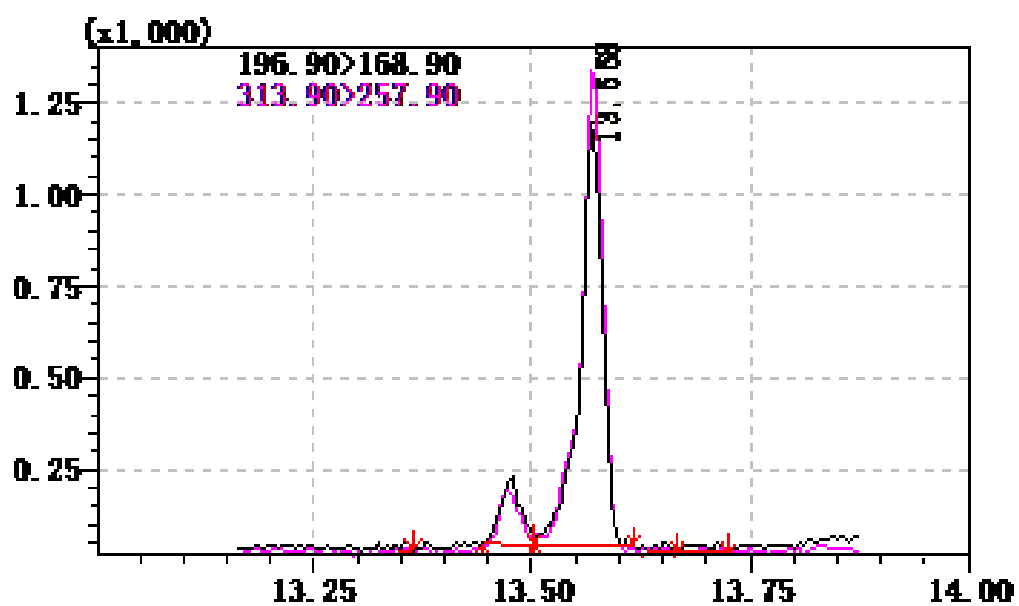

Figure S3 Chromatogram of chlorpyrifos in the mixed solvent of acetonitrile and toluene

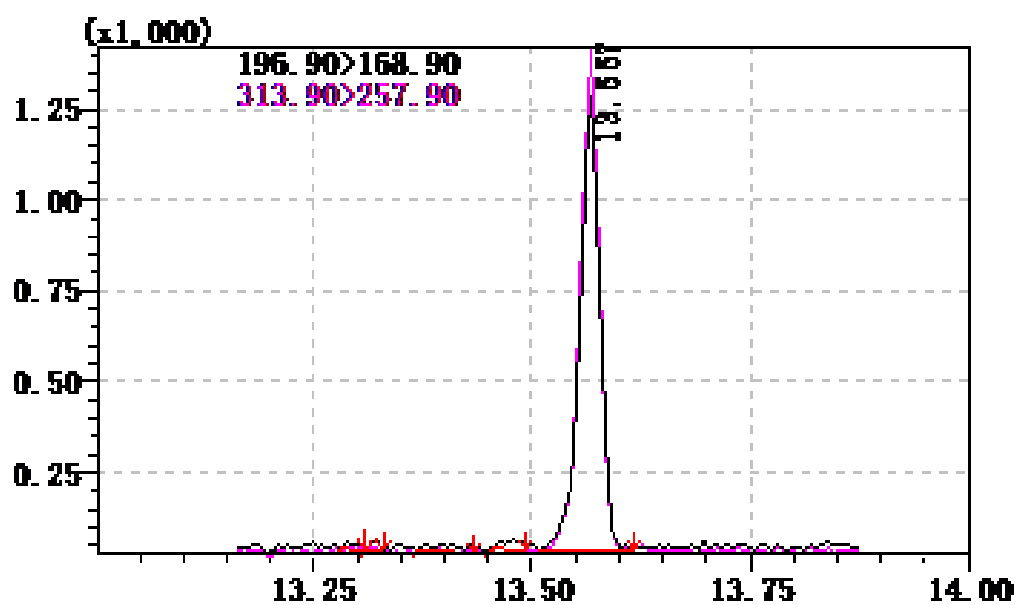

Figure S4 Chromatogram of chlorpyrifos in ethyl acetate

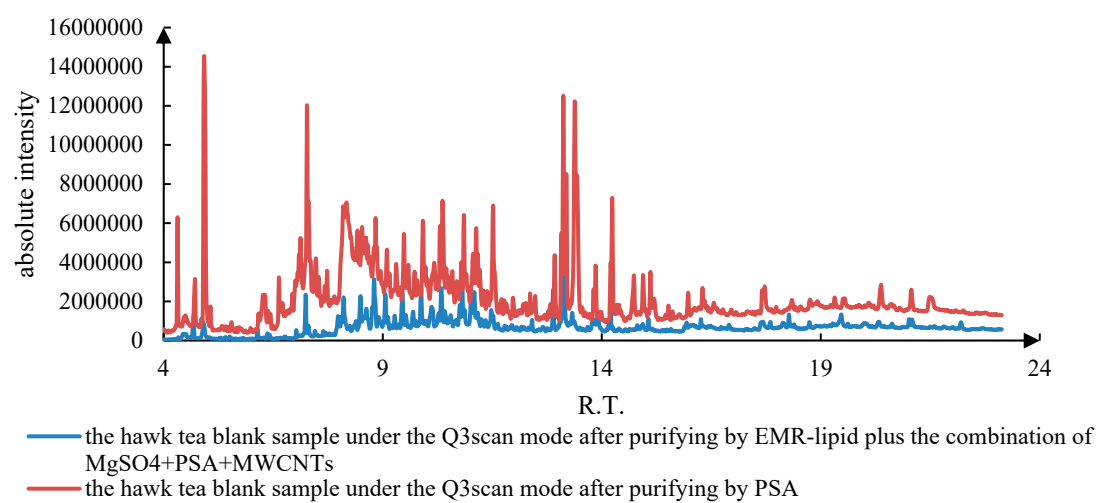

**Figure S5 The hawk tea blank sample under the Q3scan mode after purification by different materials.**
